# Supplementary material for: SETD2 suppresses tumorigenesis in a KRASG12C-driven lung cancer model, and its catalytic activity is regulated by histone acetylation
Source: eLife journal article supplement (doi:10.7554/elife.107451), 2025-07-09

11  
12  
13  
14  
15  
16  
17  
18  
19  
20  
21  
22  
23  
24  
25  
26  
27  
28  
29  
30  
31  
32  
33  
34  
35  
36  
37  
38  
39  
40  
41  
42  
43  
44  
45  
46  
47  
48  
49  
50  
51  
52  
53  
54  
55  
56  
57  
58  
59  
60  
61  
62  
63  
64  
65  
66  
67  
68  
69  
70  
71  
72  
73  
74  
75  
76  
77  
78  
79  
80  
81  
82  
83  
84  
85  
86  
87  
88  
89  
90  
91  
92  
93  
94  
95  
96  
97  
98  
99  
100

11  
12  
13  
14  
15  
16  
17  
18  
19  
20  
21  
22  
23  
24  
25  
26  
27  
28  
29  
30  
31  
32  
33  
34  
35  
36  
37  
38  
39  
40  
41  
42  
43  
44  
45  
46  
47  
48  
49  
50  
51  
52  
53  
54  
55  
56  
57  
58  
59  
60  
61  
62  
63  
64  
65  
66  
67  
68  
69  
70  
71  
72  
73  
74  
75  
76  
77  
78  
79  
80  
81  
82  
83  
84  
85  
86  
87  
88  
89  
90  
91  
92  
93  
94  
95  
96  
97  
98  
99  
100

11  
12  
13  
14  
15  
16  
17  
18  
19  
20  
21  
22  
23  
24  
25  
26  
27  
28  
29  
30  
31  
32  
33  
34  
35  
36  
37  
38  
39  
40  
41  
42  
43  
44  
45  
46  
47  
48  
49  
50  
51  
52  
53  
54  
55  
56  
57  
58  
59  
60  
61  
62  
63  
64  
65  
66  
67  
68  
69  
70  
71  
72  
73  
74  
75  
76  
77  
78  
79  
80  
81  
82  
83  
84  
85  
86  
87  
88  
89  
90  
91  
92  
93  
94  
95  
96  
97  
98  
99  
100

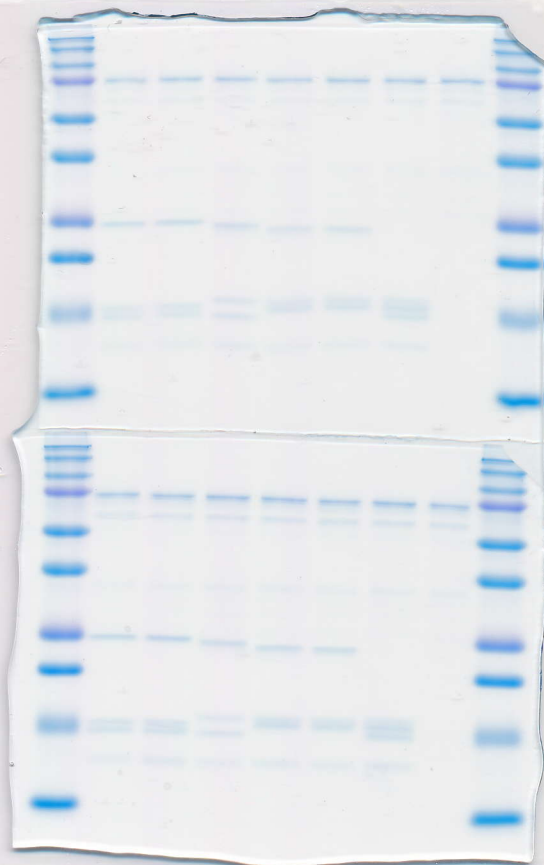

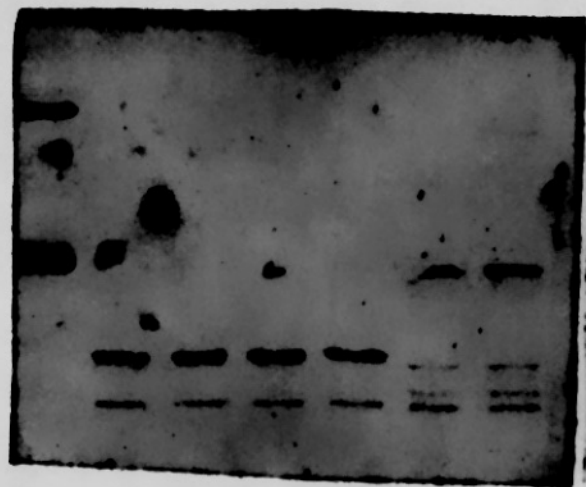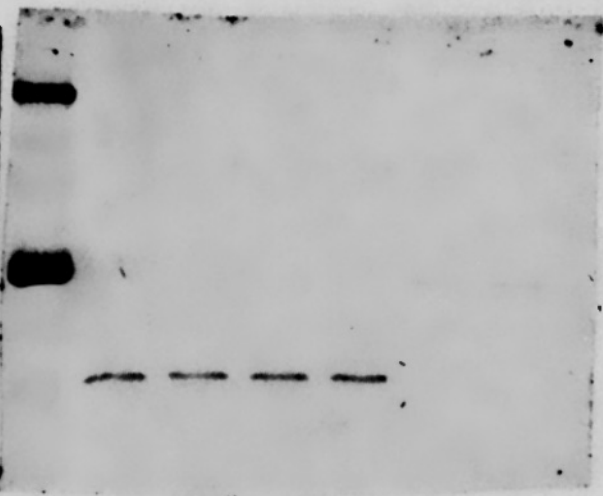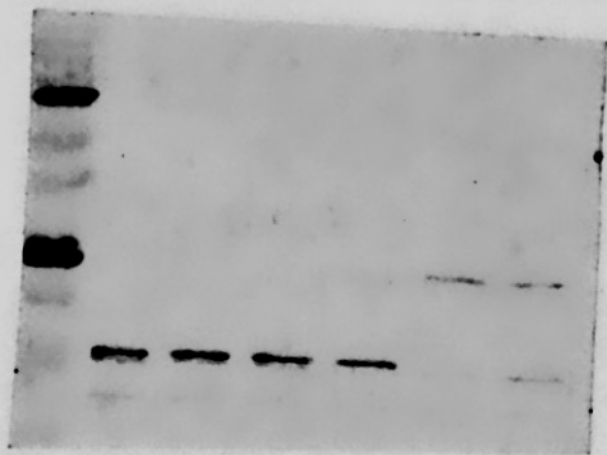

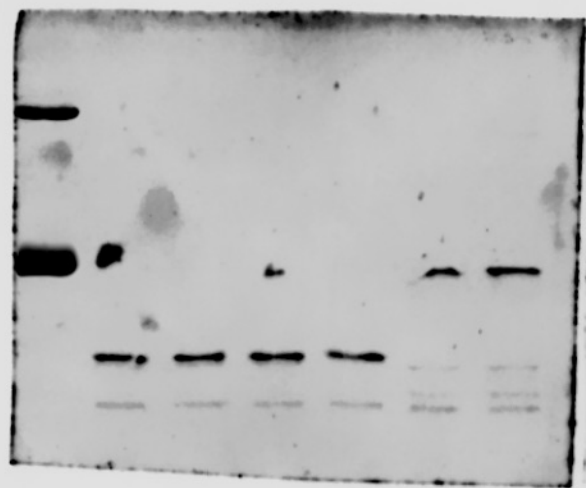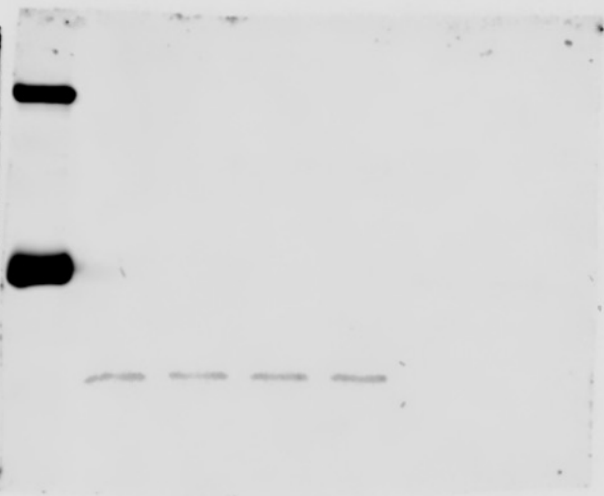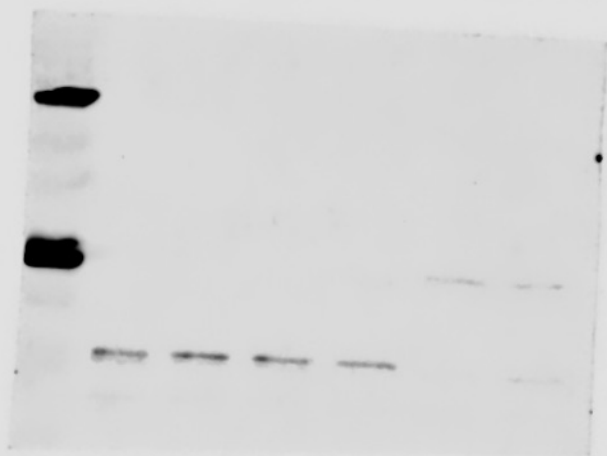



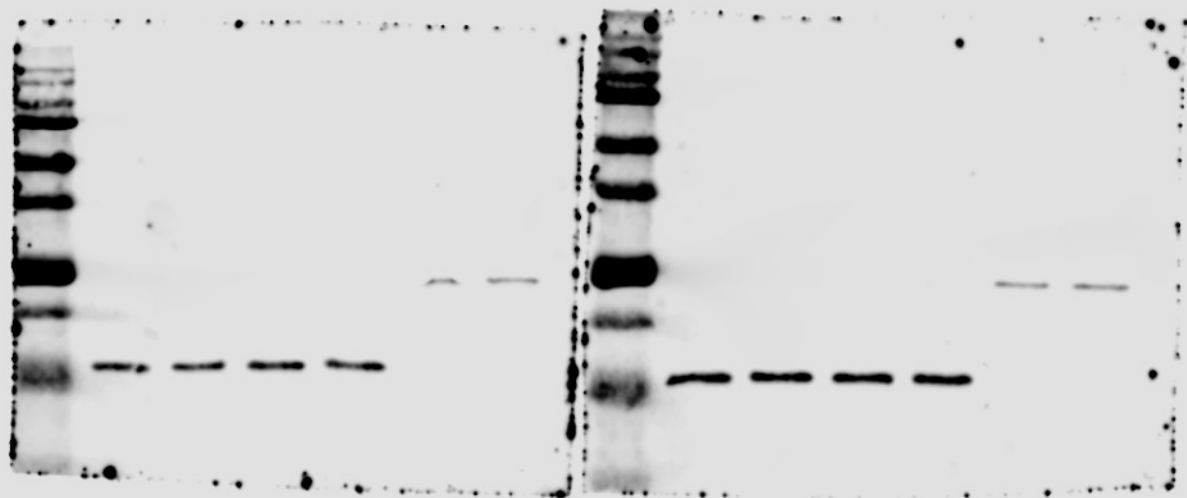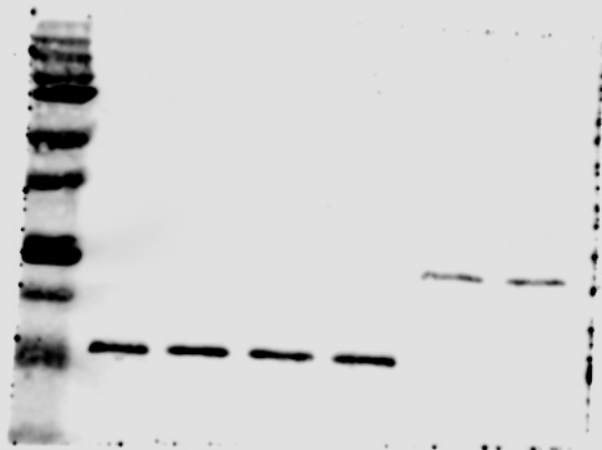

SETOR

2~day

8/11

U6

Ø 15 119 120 14 18

✓

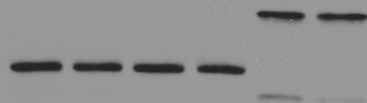

HAC

Ø H24 H3 H4

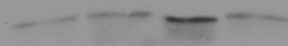

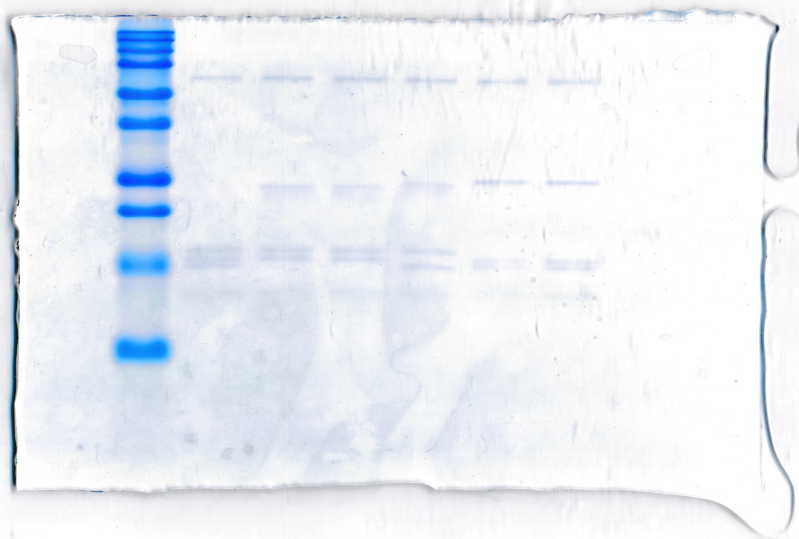

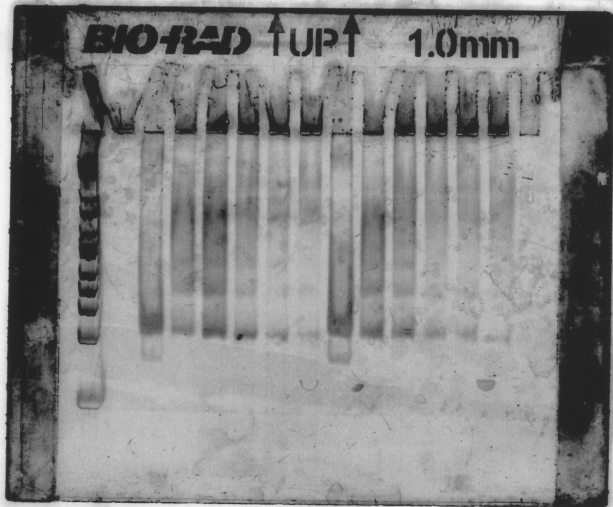

Name: Ricardo 2025-02-28 03h51m27s

Acquired: 2/28/2025 3:51:27 AM

Application: SYBR Gold

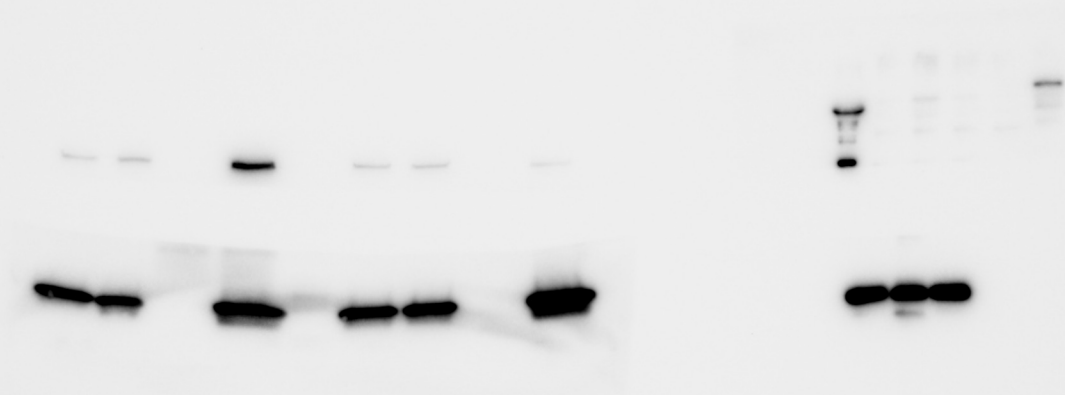

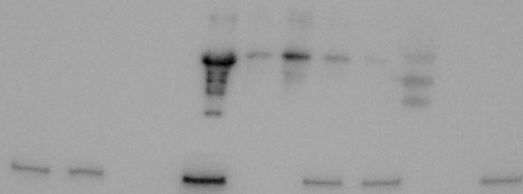

T *W*

SFDR

4/9

C1-day

Ø Ø H2A H3 H4

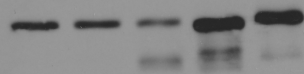

Ø Ø K4 K9 K14 K18 K23 K27

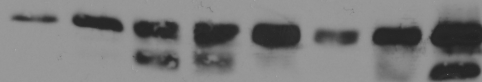

*W*



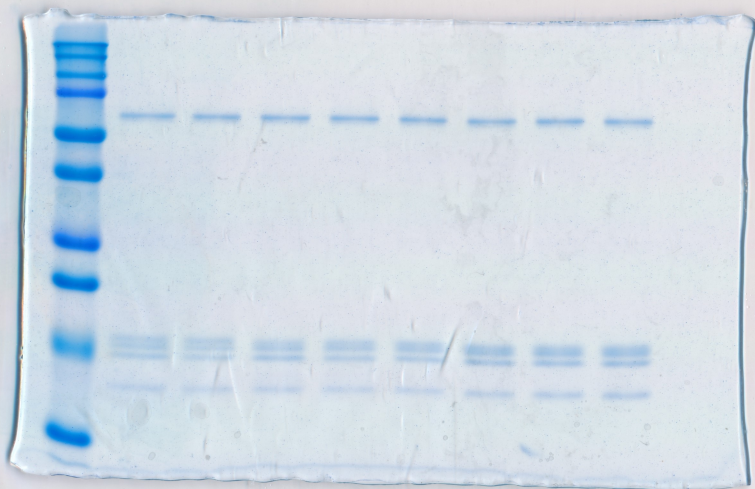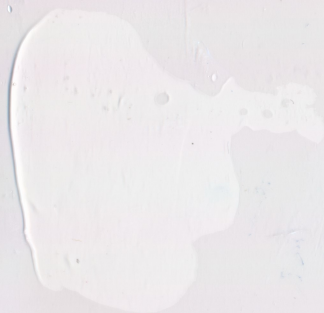

RTM

SETD2 + Dot1L

11/20

< 1-day

FOP

Ø H2A H3 H4

Ø H2A H3 H4

—  
—  
—

—

—  
—  
—

—  
—  
—

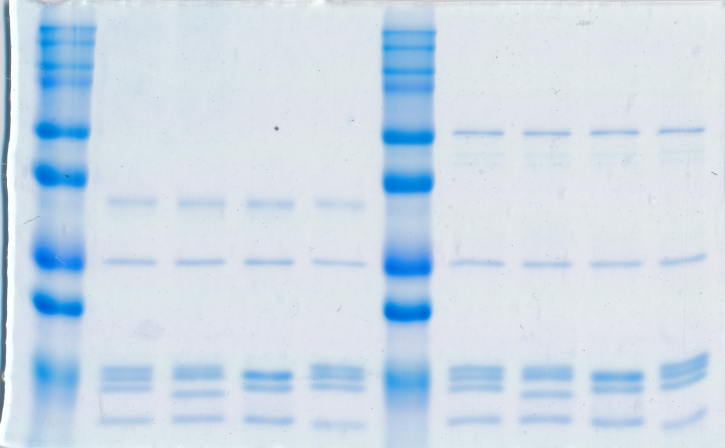

B.

NSDZ x H2Ac, H3Ac,  
H4Ac.

2-day Exposure  
(Apr 13 → Apr 15, 2024)

0.5  $\mu$ g NSDZ  
1  $\mu$ g NUCs except  
unmod (1.2  $\mu$ g)

unmod

H2Ac

H3Ac

H4Ac

---

1/2 1/2



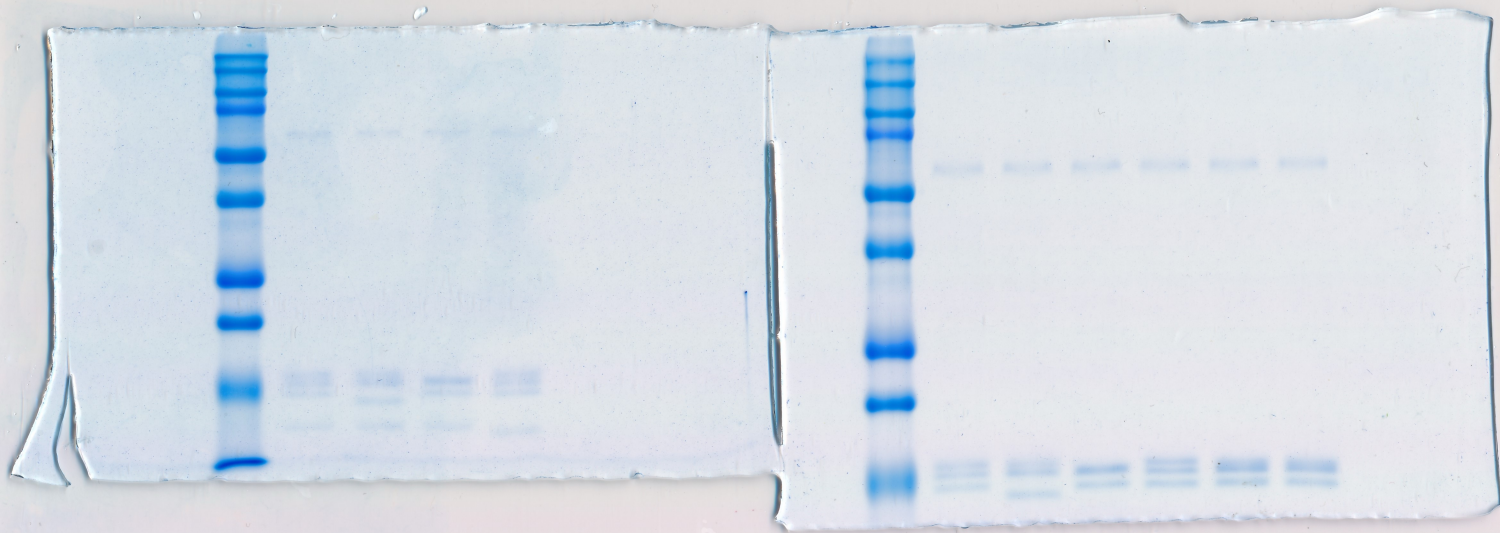

SETR

10/22  
2-day  
Bottom  
Top

Ø H2A H3 H4

---

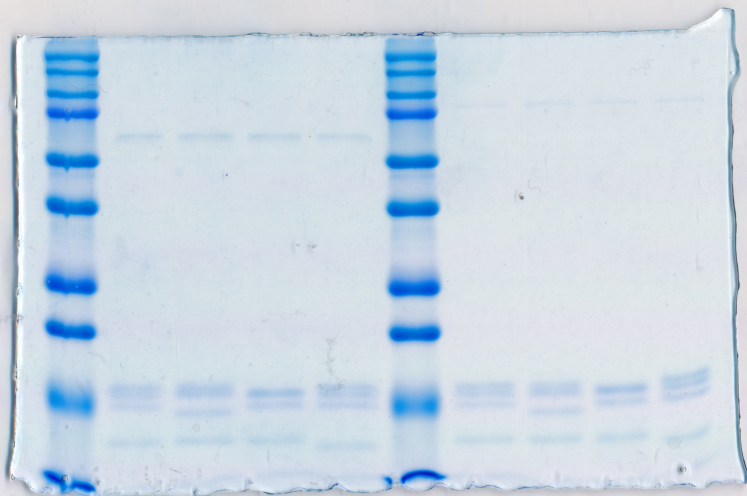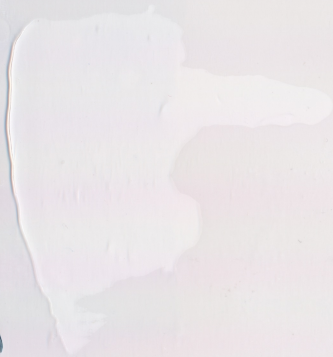



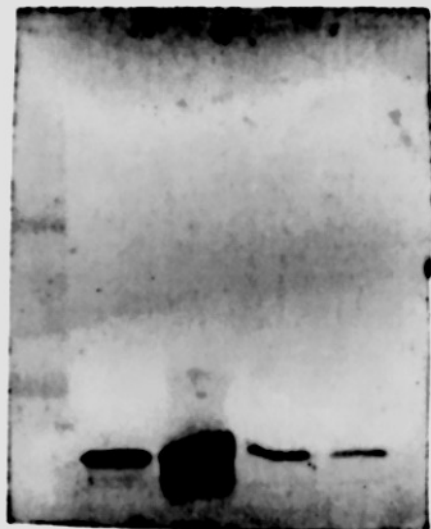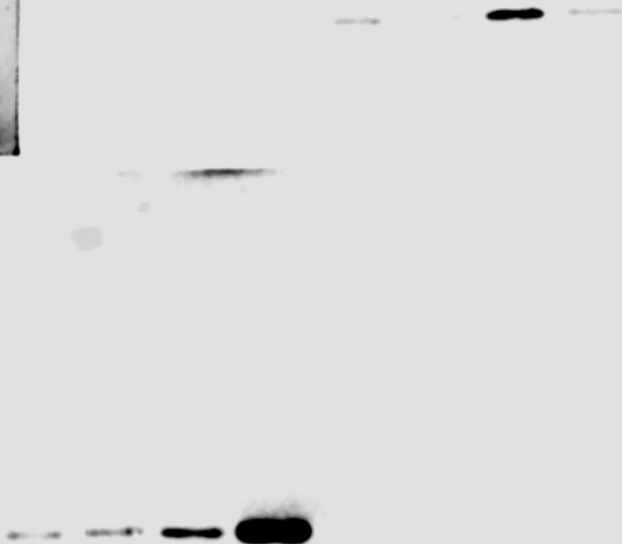

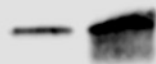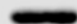

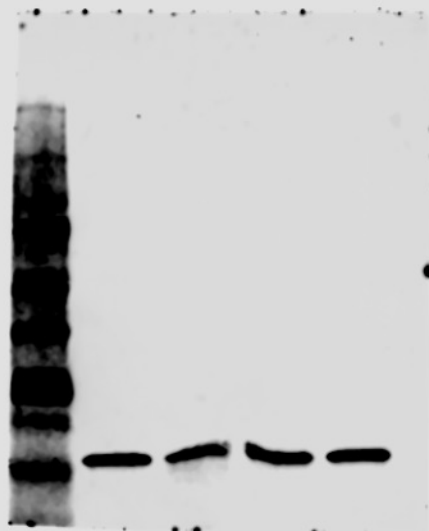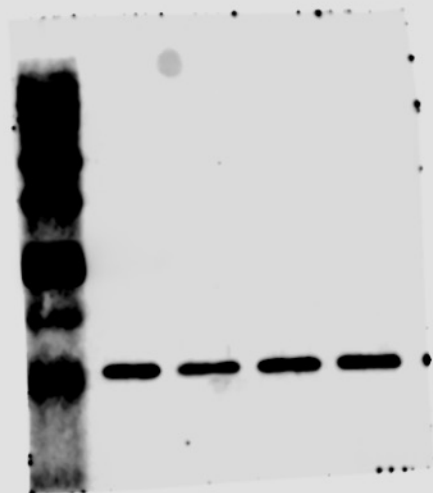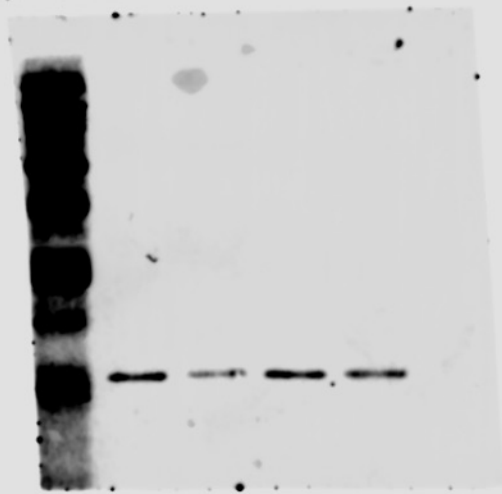

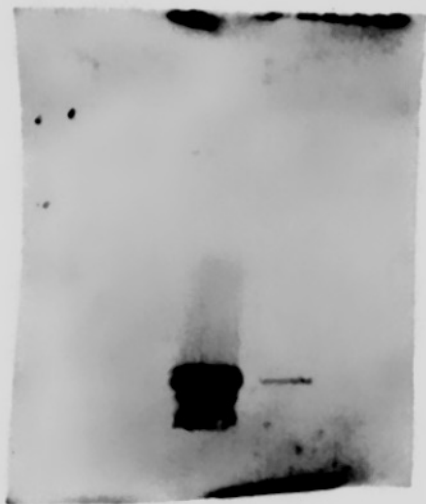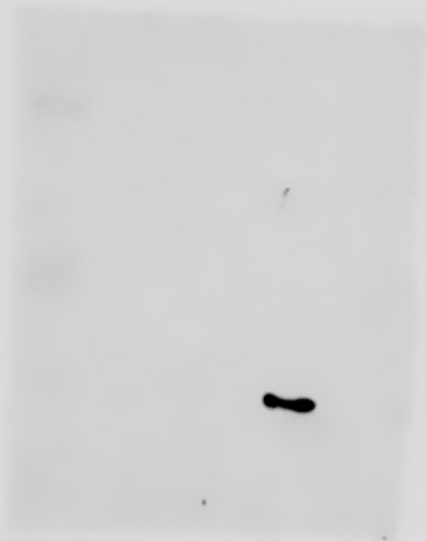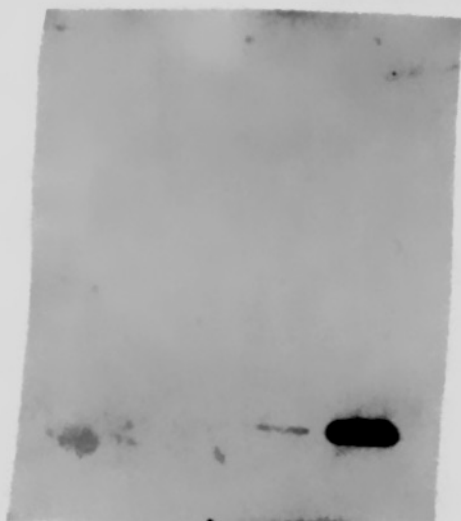

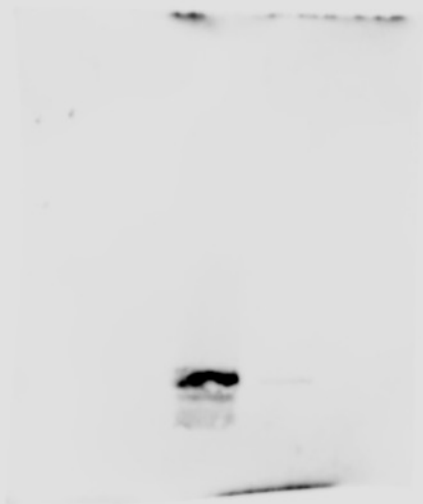

1

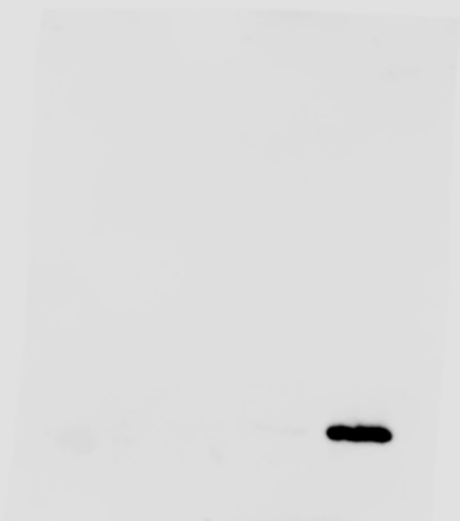

1

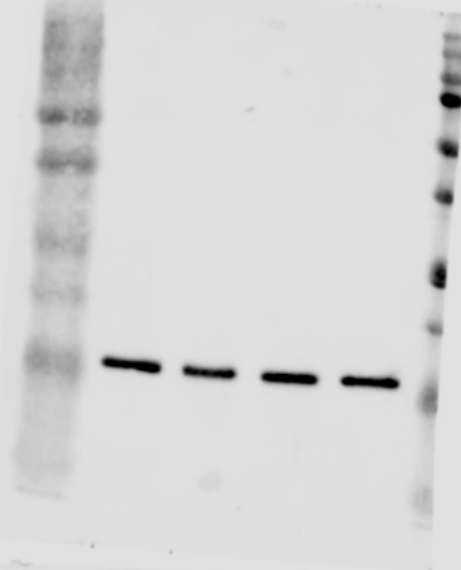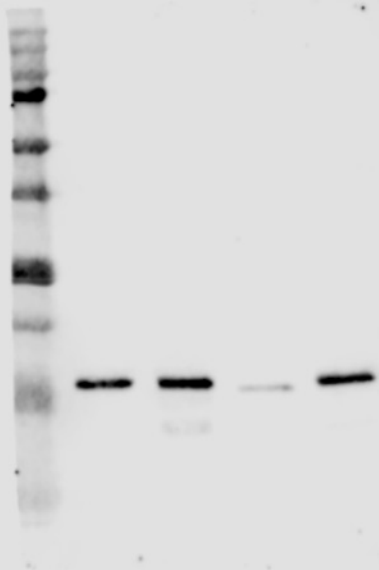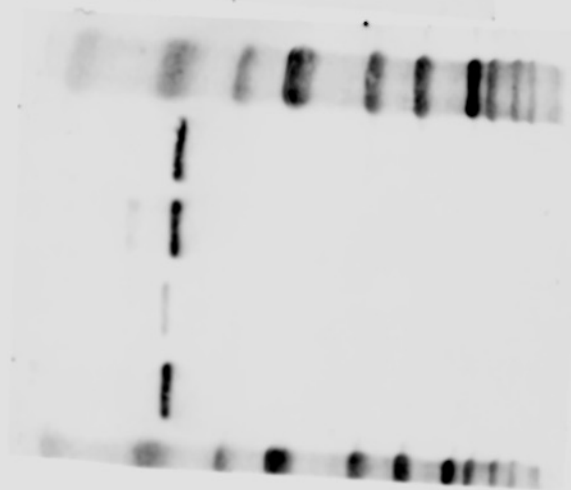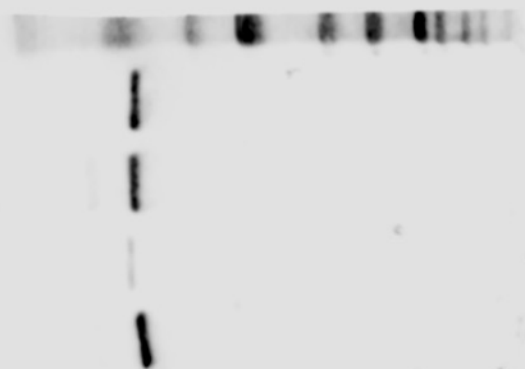

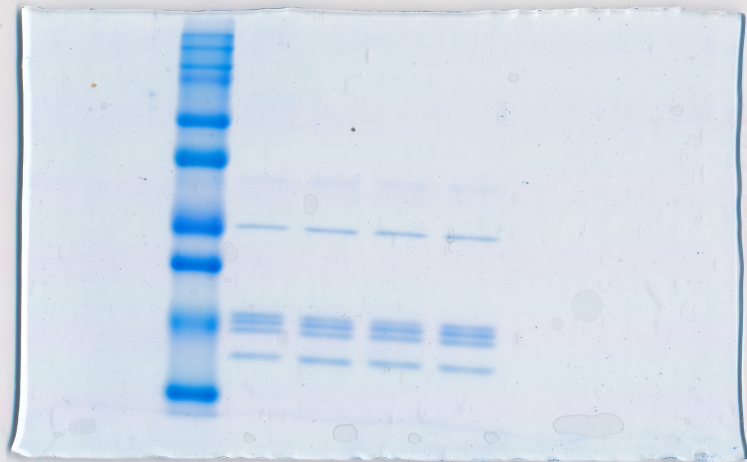



NSD2

2/1/25

~ 1.5 north  
exposure  
~~Butterfly~~  
middle

or 1-36 2 3

11  
11  
11  
11

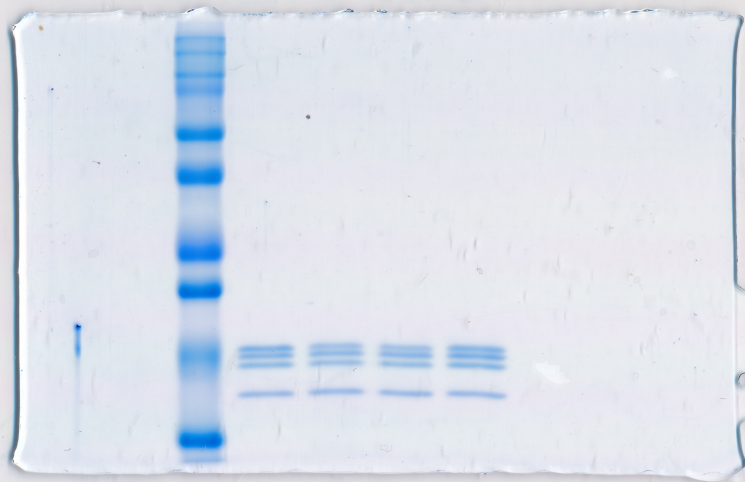

SETD2

8/7

4-day EXP

06

0. 1.65 1.119 1.20 1.4 1.8

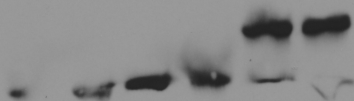

K36

0. 1.65 1.119 1.20 1.4 1.8

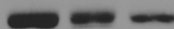

Supplement: fig5-data1 [file Fig5E.pdf › Figure 5_Source Data/Fig5E.pdf]
