# Supplementary figures and images for: SETD2 suppresses tumorigenesis in a KRASG12C-driven lung cancer model, and its catalytic activity is regulated by histone acetylation
Source: eLife journal article supplement (doi:10.7554/elife.107451), 2025-07-09

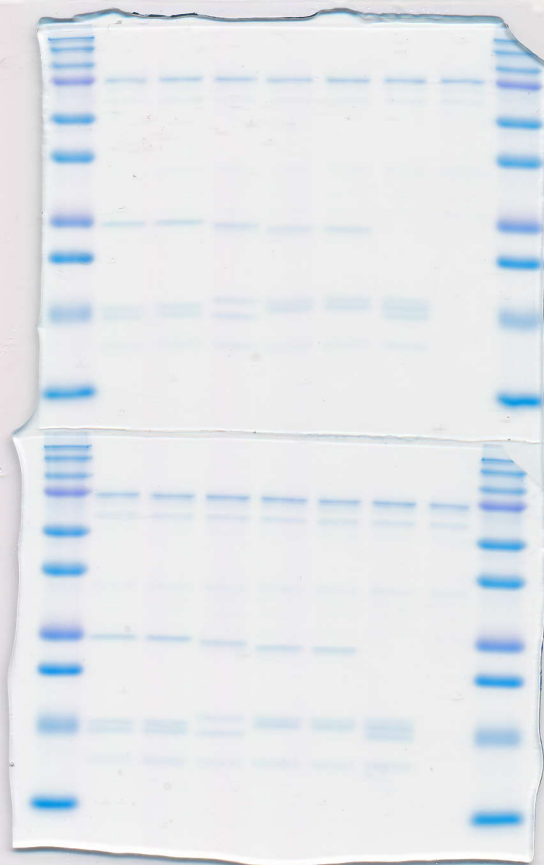

Supplement: fig5-data1 [file Fig5E_C.pdf › Figure 5_Source Data/Fig5E_C.pdf]
